# Supplementary material for: A Flexible Genome-Scale Resource of SARS-CoV-2 Coding Sequence Clones
Source: Preprints.org preprint supplement (doi:10.20944/preprints202004.0009.v1), 2020-04-02
Supplement: Supplementary file 2 [file supplementary]

## Sheet: Supplementary table 1
Gene Symbol	Synthesized CDS Name	Protein Type	Status	Putative Function/Domain	Coding Sequence Length	Amino Acid Length	Coding Sequence	Vector Backbone (Selection)	Clone with STOP Codon
ORF1AB (split into 16 protein)	NSP1	Nonstructural	In collection	Suppress antiviral host response	543	180	ATGGAGAGCCTGGTGCCTGGCTTCAACGAAAAGACCCACGTGCAGCTGTCTCTGCCAGTGCTGCAGGTGCGCGACGTGCTGGTGAGGGGATTCGGTGACTCTGTGGAGGAAGTGCTGTCTGAAGCTAGACAGCACCTGAAGGATGGTACCTGCGGACTGGTGGAGGTGGAAAAGGGCGTGCTGCCCCAGCTGGAGCAGCCTTACGTGTTCATCAAGCGCAGCGATGCTAGGACTGCTCCCCACGGACACGTGATGGTGGAACTGGTGGCCGAGCTGGAAGGTATCCAGTACGGTCGCTCCGGAGAGACCCTGGGTGTGCTGGTGCCACACGTGGGTGAAATCCCCGTGGCTTACAGAAAGGTGCTGCTGCGTAAGAACGGAAACAAGGGTGCCGGCGGA…	pDONR207 (Gentamycin)	Addgene: 141255
	NSP2	Nonstructural	In collection	Unknown. Mutations found in NSP2 suggest this CDS may play a role in infectious capability and differentiation (Guo et al., 2020 [PMID: 32169119]).	1920	639	ATGGCTTACACCCGCTACGTGGACAACAACTTCTGCGGTCCCGACGGCTACCCTCTGGAATGCATCAAGGACCTGCTGGCTAGAGCTGGCAAGGCTAGCTGCACCCTGTCCGAGCAGCTGGACTTCATCGACACCAAGAGAGGAGTGTACTGCTGCCGTGAGCACGAACACGAGATCGCTTGGTACACCGAAAGATCCGAGAAGTCTTACGAGCTGCAGACCCCATTCGAAATCAAGCTGGCCAAGAAGTTCGACACCTTCAACGGCGAGTGCCCAAACTTCGTGTTCCCCCTGAACAGCATCATCAAGACCATCCAGCCCCGTGTGGAGAAGAAGAAGCTGGACGGATTCATGGGTCGCATCCGCAGCGTGTACCCAGTGGCTAGCCCCAACGAATGC…	pDONR223 (Spectinomycin)	Addgene: 141256
	PLPRO (NSP3)	Nonstructural	In collection	Putative PL-pro domain	5841	1946	ATGGCCCCTACCAAGGTGACCTTCGGAGACGACACCGTGATCGAGGTGCAGGGTTACAAGAGCGTGAACATCACCTTCGAGCTGGACGAACGCATCGACAAGGTGCTGAACGAAAAGTGCTCCGCTTACACCGTGGAGCTGGGCACCGAGGTGAACGAATTCGCCTGCGTGGTGGCCGACGCTGTGATCAAGACCCTGCAGCCAGTGTCCGAACTGCTGACCCCTCTGGGTATCGACCTGGACGAGTGGTCTATGGCTACCTACTACCTGTTCGACGAGAGCGGCGAATTCAAGCTGGCCTCTCACATGTACTGCAGCTTCTACCCTCCCGACGAAGACGAGGAAGAGGGTGACTGCGAAGAGGAAGAGTTCGAGCCTTCCACTCAGTACGAGTACGGC…	pDONR207 (Gentamycin)	Addgene: 141257
	NSP4	Nonstructural	In collection	Complex with NSP3 & 6 for DMV (double-membrane vesicle) formation	1506	501	ATGAAGATCGTGAACAACTGGCTGAAGCAGCTGATCAAGGTGACCCTGGTGTTCCTGTTCGTGGCCGCTATCTTCTACCTGATCACCCCTGTGCACGTGATGAGCAAGCACACCGACTTCAGCTCCGAGATCATCGGCTACAAGGCCATCGACGGCGGAGTGACCAGAGACATCGCTTCCACCGACACCTGCTTCGCCAACAAGCACGCTGACTTCGACACCTGGTTCTCCCAGAGAGGTGGCTCTTACACCAACGACAAGGCCTGCCCACTGATCGCCGCTGTGATCACCCGTGAAGTGGGATTCGTGGTGCCTGGCCTGCCAGGAACCATCCTGAGAACCACCAACGGTGACTTCCTGCACTTCCTGCCACGCGTGTTCAGCGCCGTGGGCAACATC…	pDONR223 (Spectinomycin)	Addgene: 141258
	NSP5	Nonstructural	In collection	3CL-pro domain	924	307	ATGTCCGGATTCCGCAAGATGGCCTTCCCTTCTGGCAAGGTGGAGGGCTGCATGGTGCAGGTGACCTGCGGAACCACCACCCTGAACGGTCTGTGGCTGGACGACGTGGTGTACTGCCCCAGGCACGTGATCTGCACCTCTGAGGACATGCTGAACCCTAACTACGAAGACCTGCTGATCAGAAAGAGCAACCACAACTTCCTGGTGCAGGCCGGTAACGTGCAGCTGCGTGTGATCGGCCACTCTATGCAGAACTGCGTGCTGAAGCTGAAGGTGGACACCGCTAACCCCAAGACCCCTAAGTACAAGTTCGTGAGAATCCAGCCTGGTCAGACCTTCTCCGTGCTGGCCTGCTACAACGGAAGCCCATCCGGCGTGTACCAGTGCGCTATGCGTCCC…	pDONR223 (Spectinomycin)	Addgene: 141259
	NSP6	Nonstructural	In collection	Complex with NSP 3 & 4 for DMV formation	876	291	ATGAGCGCCGTGAAGAGAACCATCAAGGGAACCCACCACTGGCTGCTGCTGACCATCCTGACCTCCCTGCTGGTGCTGGTGCAGTCTACCCAGTGGAGCCTGTTCTTCTTCCTGTACGAGAACGCCTTCCTGCCCTTCGCTATGGGTATCATCGCCATGTCCGCCTTCGCTATGATGTTCGTGAAGCACAAGCACGCTTTCCTGTGCCTGTTCCTGCTGCCATCCCTGGCCACCGTGGCTTACTTCAACATGGTGTACATGCCCGCCTCTTGGGTCATGCGCATCATGACCTGGCTGGACATGGTGGACACCAGCCTGTCCGGCTTCAAGCTGAAGGACTGCGTGATGTACGCCTCTGCTGTGGTGCTGCTGATCCTGATGACCGCTAGAACCGTGTAC…	pDONR223 (Spectinomycin)	Addgene: 141260
	NSP7	Nonstructural	In collection	Complex with NSP8: Primase	255	84	ATGAGCAAGATGTCCGACGTGAAGTGCACCTCCGTGGTGCTGCTGTCTGTGCTGCAGCAGCTGCGCGTGGAGAGCTCCTCTAAGCTGTGGGCCCAGTGCGTGCAGCTGCACAACGACATCCTGCTGGCCAAGGACACCACCGAGGCTTTCGAAAAGATGGTGTCTCTGCTGAGCGTGCTGCTGTCCATGCAGGGAGCTGTGGACATCAACAAGCTGTGCGAGGAAATGCTGGACAACAGGGCTACCCTGCAGTAA	pDONR223 (Spectinomycin)	Addgene: 141261
	NSP8	Nonstructural	In collection	Complex with NSP7: Primase	600	199	ATGGCCATCGCTAGCGAGTTCAGCTCCCTGCCTTCCTACGCCGCTTTCGCCACCGCTCAGGAGGCTTACGAACAGGCCGTGGCTAACGGCGACTCCGAAGTGGTGCTGAAGAAGCTGAAGAAGTCCCTGAACGTGGCCAAGTCTGAGTTCGACAGAGACGCCGCTATGCAGCGTAAGCTGGAAAAGATGGCCGACCAGGCTATGACCCAGATGTACAAGCAGGCTCGCTCTGAGGACAAGAGGGCTAAGGTGACCAGCGCCATGCAGACCATGCTGTTCACCATGCTGCGCAAGCTGGACAACGACGCTCTGAACAACATCATCAACAACGCCAGAGACGGCTGCGTGCCCCTGAACATCATCCCTCTGACCACCGCCGCTAAGCTGATGGTGGTCATC…	pDONR223 (Spectinomycin)	Addgene: 141262
	NSP9	Nonstructural	In collection	RNA/DNA binding activity	345	114	ATGAACAACGAGCTGAGCCCTGTGGCCCTGAGACAGATGTCTTGTGCTGCTGGTACCACCCAGACCGCTTGCACCGACGACAACGCCCTGGCTTACTACAACACCACCAAGGGCGGAAGATTCGTGCTGGCCCTGCTGTCTGACCTGCAGGACCTGAAGTGGGCTCGTTTCCCCAAGAGCGACGGTACCGGCACCATCTACACCGAGCTGGAACCCCCTTGCAGATTCGTGACCGACACCCCAAAGGGCCCCAAGGTGAAGTACCTGTACTTCATCAAGGGACTGAACAACCTGAACAGAGGAATGGTGCTGGGTAGCCTGGCTGCTACCGTGAGGCTGCAGTAA	pDONR223 (Spectinomycin)	Addgene: 141263
	NSP10	Nonstructural	In collection	Complex with NSP14: Replication fidelity	423	140	ATGGCTGGTAACGCTACTGAGGTGCCTGCTAACAGCACCGTGCTGTCCTTCTGCGCCTTCGCTGTGGACGCCGCTAAGGCCTACAAGGACTACCTGGCTTCCGGCGGACAGCCTATCACCAACTGCGTGAAGATGCTGTGCACCCACACCGGAACCGGTCAGGCCATCACCGTGACCCCAGAGGCTAACATGGACCAGGAATCTTTCGGTGGCGCCAGCTGCTGCCTGTACTGCAGATGCCACATCGACCACCCCAACCCTAAGGGTTTCTGCGACCTGAAGGGCAAGTACGTGCAGATCCCAACCACCTGCGCTAACGACCCCGTGGGATTCACCCTGAAGAACACCGTGTGCACCGTGTGCGGAATGTGGAAGGGCTACGGATGCTCTTGCGACCAG…	pDONR223 (Spectinomycin)	Addgene: 141264
	NSP11	Nonstructural	Omitted due to short length	Short peptide at the end of orf1a with unknown function	36	12	NA	NA	NA
	RNA-pol (NSP12)	Nonstructural	In collection	RNA-dependent RNA polymerase	2760	919	ATGTCCGCCGCTAGACTGACTCCTTGTGGTACTGGCACCTCTACTGACGTGGTGTACAGGGCCTTCGACATCTACAACGACAAGGTGGCCGGATTCGCTAAGTTCCTGAAGACCAACTGCTGCCGCTTCCAGGAGAAGGACGAAGACGACAACCTGATCGACTCTTACTTCGTGGTGAAGAGGCACACCTTCAGCAACTACCAGCACGAGGAAACCATCTACAACCTGCTGAAGGACTGCCCCGCCGTGGCTAAGCACGACTTCTTCAAGTTCCGCATCGACGGTGACATGGTGCCTCACATCAGCCGCCAGAGGCTGACCAAGTACACCATGGCCGACCTGGTGTACGCTCTGAGGCACTTCGACGAGGGCAACTGCGACACCCTGAAGGAAATCCTG…	pDONR223 (Spectinomycin)	Addgene: 141265
	Heli (NSP13)	Nonstructural	In collection	Helicase	1809	602	ATGGCCGTGGGCGCTTGCGTGCTGTGCAACTCTCAGACCAGCCTGAGATGTGGAGCTTGCATCCGCAGGCCTTTCCTGTGCTGCAAGTGCTGCTACGACCACGTGATCAGCACCTCCCACAAGCTGGTGCTGTCCGTGAACCCATACGTGTGCAACGCTCCTGGTTGTGACGTGACTGACGTGACCCAGCTGTACCTGGGCGGAATGAGCTACTACTGCAAGTCCCACAAGCCCCCTATCAGCTTCCCACTGTGCGCTAACGGCCAGGTGTTCGGACTGTACAAGAACACCTGCGTGGGCTCCGACAACGTGACCGACTTCAACGCCATCGCTACCTGCGACTGGACCAACGCCGGAGACTACATCCTGGCTAACACCTGCACCGAAAGGCTGAAGCTG…	pDONR223 (Spectinomycin)	Addgene: 141266
	NSP14	Nonstructural	In collection	ExoN: 3'-5' exonuclease	1587	528	ATGGCTGAGAACGTGACCGGTCTGTTCAAGGACTGCTCTAAGGTCATCACTGGTCTGCACCCAACTCAGGCTCCAACCCACCTGTCTGTGGACACCAAGTTCAAGACCGAAGGACTGTGCGTGGACATCCCCGGTATCCCTAAGGACATGACCTACCGCAGGCTGATCTCCATGATGGGCTTCAAGATGAACTACCAGGTGAACGGATACCCTAACATGTTCATCACCAGAGAGGAAGCTATCCGCCACGTGAGGGCCTGGATCGGTTTCGACGTGGAAGGTTGCCACGCTACCAGAGAAGCTGTGGGTACCAACCTGCCACTGCAGCTGGGCTTCTCTACCGGAGTGAACCTGGTGGCTGTGCCTACCGGCTACGTGGACACCCCAAACAACACCGAC…	pDONR223 (Spectinomycin)	Addgene: 141267
	NSP15	Nonstructural	In collection	XendoU: poly(U)-Spectinomycinific endoribonuclease	1044	347	ATGTCTCTGGAGAACGTGGCCTTCAACGTGGTGAACAAGGGTCACTTCGACGGTCAGCAGGGCGAAGTGCCTGTGAGCATCATCAACAACACCGTGTACACCAAGGTGGACGGCGTGGACGTGGAGCTGTTCGAAAACAAGACCACCCTGCCAGTGAACGTGGCCTTCGAGCTGTGGGCTAAGCGCAACATCAAGCCCGTGCCTGAAGTGAAGATCCTGAACAACCTGGGAGTGGACATCGCCGCTAACACCGTGATCTGGGACTACAAGAGGGACGCCCCCGCTCACATCAGCACCATCGGCGTGTGCTCCATGACCGACATCGCCAAGAAGCCTACCGAGACCATCTGCGCTCCACTGACCGTGTTCTTCGACGGAAGAGTGGACGGTCAGGTGGAC…	pDONR223 (Spectinomycin)	Addgene: 141268
	NSP16	Nonstructural	In collection	2'-O'-MT: 2'-O-ribo methyltransferase	900	299	ATGTCTTCCCAGGCTTGGCAGCCTGGAGTGGCTATGCCTAACCTGTACAAGATGCAGCGTATGCTGCTGGAGAAGTGCGACCTGCAGAACTACGGAGACTCCGCCACCCTGCCCAAGGGTATCATGATGAACGTGGCTAAGTACACCCAGCTGTGCCAGTACCTGAACACCCTGACCCTGGCCGTGCCTTACAACATGCGCGTGATCCACTTCGGTGCTGGTTCTGACAAGGGAGTGGCTCCAGGTACCGCTGTGCTGAGACAGTGGCTGCCCACCGGTACCCTGCTGGTGGACTCTGACCTGAACGACTTCGTGTCTGATGCTGACAGCACCCTGATCGGCGACTGTGCTACTGTGCACACCGCTAACAAGTGGGACCTGATCATCTCTGACATGTAC…	pDONR223 (Spectinomycin)	Addgene: 141269
S	S	Structural	In production	Spike glycoprotein trimer that binds to host cell receptor ACE2	3822	1273	ATGTTCGTGTTCCTGGTGCTGCTGCCACTGGTGAGCTCCCAGTGCGTGAACCTGACCACCAGAACCCAGCTGCCACCTGCCTACACCAACTCCTTCACCAGGGGCGTGTACTACCCAGACAAGGTGTTCAGATCCAGCGTGCTGCACTCTACCCAGGACCTGTTCCTGCCATTCTTCTCTAACGTGACCTGGTTCCACGCCATCCACGTGTCTGGAACCAACGGCACCAAGAGATTCGACAACCCAGTGCTGCCATTCAACGACGGCGTGTACTTCGCTTCTACCGAGAAGTCTAACATCATCAGGGGTTGGATCTTCGGAACCACCCTGGACTCTAAGACCCAGTCTCTGCTGATCGTGAACAACGCTACCAACGTGGTGATCAAGGTGTGCGAGTTC…	pDONR223 (Spectinomycin)	In preparation
ORF3A	3A	Accessory	In collection	Activate inflammatory response and induce apoptosis	828	275	ATGGACCTGTTCATGAGAATCTTCACCATCGGCACCGTGACCCTGAAGCAGGGAGAGATCAAGGACGCCACCCCTTCTGACTTCGTGCGTGCCACCGCTACCATCCCAATCCAGGCTAGCCTGCCCTTCGGATGGCTGATCGTGGGTGTGGCCCTGCTGGCCGTGTTCCAGTCCGCCTCTAAGATCATCACCCTGAAGAAGAGGTGGCAGCTGGCTCTGTCCAAGGGTGTGCACTTCGTGTGCAACCTGCTGCTGCTGTTCGTGACCGTGTACTCACACCTGCTGCTGGTGGCTGCTGGTCTGGAGGCTCCATTCCTGTACCTGTACGCTCTGGTGTACTTCCTGCAGAGCATCAACTTCGTGCGCATCATCATGAGGCTGTGGCTGTGCTGGAAGTGC…	pDONR207 (Gentamycin)	Addgene: 141271
ORF3B	3B	Accessory	In collection	Activate inflammatory response and inhibit the expression of IFNβ	174	58	ATGGCCTACTGCTGGCGCTGCACCAGCTGCTGCTTCTCCGAGAGGTTCCAGAACCACAACCCCCAGAAGGAAATGGCTACCTCTACCCTGCAGGGTTGTTCTCTGTGCCTGCAGCTGGCTGTGGTGGTGTGCAACAGCCTGCTGACCCCCTTCGCTAGATGCTGCTGGCCTTAA	pDONR223 (Spectinomycin)	Addgene: 141272
E	E	Structural	In collection	Envelope protein pentamer	228	75	ATGTACTCTTTCGTGAGCGAGGAAACCGGCACCCTGATCGTGAACTCCGTGCTGCTGTTCCTGGCCTTCGTGGTGTTCCTGCTGGTGACCCTGGCTATCCTGACCGCTCTGAGACTGTGCGCTTACTGCTGCAACATCGTGAACGTGTCCCTGGTGAAGCCCTCTTTCTACGTGTACAGCCGCGTGAAGAACCTGAACAGCTCCAGGGTGCCTGACCTGCTGGTGTAA	pDONR207 (Gentamycin)	Addgene: 141273
M	M	Structural	In collection	Membrane protein	669	222	ATGGCTGACTCTAACGGTACCATCACCGTGGAGGAACTGAAGAAGCTGCTGGAGCAGTGGAACCTGGTCATCGGCTTCCTGTTCCTGACCTGGATCTGCCTGCTGCAGTTCGCCTACGCTAACCGCAACAGGTTCCTGTACATCATCAAGCTGATCTTCCTGTGGCTGCTGTGGCCTGTGACCCTGGCTTGCTTCGTGCTGGCTGCCGTGTACCGCATCAACTGGATCACCGGCGGAATCGCCATCGCTATGGCCTGCCTGGTGGGCCTGATGTGGCTGTCTTACTTCATCGCTAGCTTCAGGCTGTTCGCCAGAACCCGTTCCATGTGGTCTTTCAACCCCGAGACCAACATCCTGCTGAACGTGCCTCTGCACGGAACCATCCTGACCAGACCACTG…	pDONR207 (Gentamycin)	Addgene: 141274
ORF6	6	Accessory	In collection	Antagonize STAT1 function & IFN signalling and induce DNA synthesis	186	61	ATGTTCCACCTGGTGGACTTCCAGGTGACCATCGCCGAGATCCTGCTGATCATCATGCGCACCTTCAAGGTGTCTATCTGGAACCTGGACTACATCATCAACCTGATCATCAAGAACCTGAGCAAGTCCCTGACCGAGAACAAGTACAGCCAGCTGGACGAGGAACAGCCCATGGAAATCGACTAA	pDONR223 (Spectinomycin)	Addgene: 141275
ORF7A	7A	Accessory	In collection	Induce inflammatory response and induce apoptosis	366	121	ATGAAGATCATCCTGTTCCTGGCCCTGATCACCCTGGCTACCTGCGAGCTGTACCACTACCAGGAATGCGTGCGCGGTACCACCGTGCTGCTGAAGGAGCCTTGCAGCTCCGGCACCTACGAAGGAAACTCCCCCTTCCACCCTCTGGCCGACAACAAGTTCGCTCTGACCTGCTTCTCTACTCAGTTCGCCTTCGCTTGCCCTGATGGTGTGAAGCACGTGTACCAGCTGCGCGCCAGGTCTGTGAGCCCAAAGCTGTTCATCAGACAGGAGGAAGTGCAGGAGCTGTACAGCCCCATCTTCCTGATCGTGGCCGCTATCGTGTTCATCACCCTGTGCTTCACCCTGAAGCGTAAGACCGAATAA	pDONR207 (Gentamycin)	Addgene: 141276
ORF7B	7B	Accessory	In collection	Induce inflammatory response	132	43	ATGATCGAGCTGAGCCTGATCGACTTCTACCTGTGCTTCCTGGCCTTCCTGCTGTTCCTGGTGCTGATCATGCTGATCATCTTCTGGTTCTCCCTGGAGCTGCAGGACCACAACGAAACCTGCCACGCTTAA	pDONR223 (Spectinomycin)	Addgene: 141277
ORF8	8	Accessory	In collection	Induce apoptosis and DNA synthesis	366	121	ATGAAGTTCCTGGTGTTCCTGGGTATCATCACCACCGTGGCCGCTTTCCACCAGGAGTGCTCTCTGCAGAGCTGCACCCAGCACCAGCCATACGTGGTGGATGACCCATGCCCTATCCACTTCTACAGCAAGTGGTACATCAGAGTGGGAGCTAGGAAGTCCGCTCCTCTGATCGAGCTGTGCGTGGACGAAGCCGGCAGCAAGTCCCCAATCCAGTACATCGACATCGGAAACTACACCGTGTCTTGCCTGCCATTCACCATCAACTGCCAGGAACCCAAGCTGGGCTCCCTGGTGGTGAGATGCTCTTTCTACGAGGACTTCCTGGAATACCACGACGTGCGTGTGGTGCTGGACTTCATCTAA	pDONR223 (Spectinomycin)	Addgene: 141278
N	N	Structural	In production	Facilitate viral RNA packaging	1260	419	ATGTCCGACAACGGTCCCCAGAACCAGCGTAACGCTCCAAGGATCACCTTCGGTGGACCTAGCGACTCCACCGGCAGCAACCAGAACGGAGAACGCTCCGGAGCCAGAAGCAAGCAGCGTAGGCCACAGGGCCTGCCTAACAACACCGCCAGCTGGTTCACCGCTCTGACCCAGCACGGAAAGGAAGACCTGAAGTTCCCAAGGGGACAGGGCGTGCCAATCAACACCAACAGCTCTCCAGACGACCAGATCGGATACTACAGGCGTGCCACCAGGCGCATCAGAGGAGGCGACGGAAAGATGAAGGACCTGTCTCCTAGGTGGTACTTCTACTACCTGGGCACCGGACCAGAGGCTGGTCTGCCATACGGCGCCAACAAGGACGGCATCATCTGGGTG…	pDONR223 (Spectinomycin)	In preparation
ORF9B	9B	Accessory	In collection	Induce apoptosis	294	98	ATGGACCCAAAGATCTCTGAAATGCACCCCGCTCTGAGACTGGTGGACCCTCAGATCCAGCTGGCCGTGACCCGCATGGAAAACGCTGTGGGCAGGGACCAGAACAACGTGGGACCCAAGGTGTACCCTATCATCCTGAGACTGGGCAGCCCTCTGTCCCTGAACATGGCCCGTAAGACCCTGAACAGCCTGGAGGACAAGGCCTTCCAGCTGACCCCAATCGCTGTGCAGATGACCAAGCTGGCCACCACCGAGGAACTGCCCGACGAATTCGTGGTGGTGACCGTGAAGTAA	pDONR223 (Spectinomycin)	Addgene: 141280
